# Supplementary material for: Identification of Hub Genes Related to Liver Metastasis of Colorectal Cancer by Integrative Analysis
Source: Front Oncol. 2021 Aug 19;11:714866. doi: 10.3389/fonc.2021.714866 (PMC8417325; doi:10.3389/fonc.2021.714866)
Supplement: Supplementary file 2 [file Table_1.xlsx]

## Sheet: Sheet1
Name	Pvalue	adjPvalue	logFC
HP	9.33285e-15	2.12322e-10	4.64351
FGG	3.58531e-14	8.15658e-10	4.59404
FGB	9.79726e-14	2.22888e-09	4.27727
ORM1	1.49326e-13	3.39716e-09	4.39824
ALB	2.18628e-13	4.97378e-09	4.91961
APOA2	3.09642e-13	7.04435e-09	3.82456
APOC3	1.24718e-12	2.83734e-08	4.04696
SERPINA3	1.94603e-12	4.42721e-08	3.51984
APOH	2.9041e-12	6.60683e-08	3.64972
GC	3.49804e-12	7.95805e-08	3.52212
TF	9.17839e-12	2.08808e-07	3.14871
IGFBP1	1.05615e-11	2.40275e-07	3.13699
ITIH3	1.05615e-11	2.40275e-07	2.8913
APOB	1.37905e-11	3.13735e-07	3.01731
AMBP	1.37905e-11	3.13735e-07	3.39142
HRG	2.7986e-11	6.36682e-07	2.59368
APCS	4.64656e-11	1.05709e-06	3.06759
FGL1	5.10515e-11	1.16142e-06	2.72604
ITIH2	5.59687e-11	1.27329e-06	2.46855
CYP2E1	6.12328e-11	1.39305e-06	2.39812
CPB2	6.68599e-11	1.52106e-06	2.36526
KNG1	6.68599e-11	1.52106e-06	2.86296
APOA1	8.60833e-11	1.95839e-06	2.93554
TTR	1.36642e-10	3.10861e-06	2.3481
FMO3	1.46854e-10	3.34093e-06	2.46142
APOC1	1.46854e-10	3.34093e-06	2.39317
CYP2C8	2.50527e-10	5.69949e-06	2.26785
ITIH4	3.00908e-10	6.84565e-06	2.26765
SERPINA1	3.79462e-10	8.63275e-06	2.57773
COLEC11	5.24925e-10	1.1942e-05	2.35686
HPX	5.5273e-10	1.25746e-05	2.3697
AHSG	1.11703e-09	2.54125e-05	2.23817
CDH2	1.21627e-09	2.76701e-05	1.96525
C6	1.26829e-09	2.88536e-05	1.63997
C4BPA	1.43442e-09	3.2633e-05	1.87614
TM4SF4	1.49326e-09	3.39716e-05	2.13858
FGA	2.03156e-09	4.6218e-05	2.9014
ARG1	2.03156e-09	4.6218e-05	1.77484
ADH1B	2.99449e-09	6.81245e-05	1.81117
ASGR2	3.20093e-09	7.28211e-05	2.07806
CP	3.76371e-09	8.56245e-05	2.45472
CFHR2	4.53346e-09	0.000103136	1.85727
ADH1A	5.10846e-09	0.000116217	1.56224
SERPIND1	5.26037e-09	0.000119674	1.56321
CRP	6.24422e-09	0.000142056	2.41175
APOE	6.60095e-09	0.000150172	1.79057
PLG	7.76323e-09	0.000176613	2.42272
LECT2	8.3988e-09	0.000191073	1.70695
HSD11B1	8.61909e-09	0.000196084	1.47613
RBP4	9.78621e-09	0.000222636	1.92367
RGN	1.27679e-08	0.000290469	1.40573
SERPINC1	1.826e-08	0.000415415	2.55054
F2	2.20373e-08	0.000501349	1.98476
C3	2.29507e-08	0.000522127	1.52135
SERPINA7	2.68908e-08	0.000611765	1.26512
C8A	2.95981e-08	0.000673357	1.77446
ASGR1	3.25049e-08	0.000739487	1.26023
SLC2A2	3.69278e-08	0.000840108	1.9794
AADAC	3.69278e-08	0.000840108	1.93486
DPYS	4.03528e-08	0.000918026	1.39798
CDO1	4.17874e-08	0.000950664	1.10924
CCL2	4.326e-08	0.000984165	1.0819
HPR	4.40107e-08	0.00100124	2.05418
C8B	6.02194e-08	0.00136999	1.29606
CFH	7.58891e-08	0.00172648	1.40476
C9	8.05028e-08	0.00183144	2.02981
F5	8.17354e-08	0.00185948	1.28343
HAMP	8.2944e-08	0.00188698	1.39443
SERPINA5	9.04797e-08	0.00205841	1.44128
PIPOX	9.31021e-08	0.00211807	1.2516
UGT2B4	1.23643e-07	0.00281287	1.74522
CYP4F2	1.24212e-07	0.00282581	1.14325
C5	1.29221e-07	0.00293978	1.53791
CYP27A1	2.14012e-07	0.00486878	1.04253
ANGPTL3	2.45282e-07	0.00558018	1.3987
ALDOB	2.53608e-07	0.00576959	1.91536
AFM	2.9216e-07	0.00664664	1.18293
CFHR4	3.081e-07	0.00700927	1.6003
HPD	3.14655e-07	0.0071584	1.52728
HAO1	3.82274e-07	0.00869673	1.07108
SERPINA10	3.97795e-07	0.00904985	1.42034
SERPINA6	5.64792e-07	0.012849	1.46405
RGS4	6.06904e-07	0.0138071	1.1141
AGT	7.60167e-07	0.0172938	1.337
AKR1C4	8.39944e-07	0.0191087	1.26505
UGT2B15	8.53827e-07	0.0194246	1.24288
TDO2	9.25841e-07	0.0210629	1.46282
PON3	9.25841e-07	0.0210629	1.16511
CPS1	1.0586e-06	0.0240832	1.12956
ALDH8A1	1.1518e-06	0.0262034	1.49787
MTTP	1.18717e-06	0.0270081	1.30954
C7	1.19843e-06	0.0272643	1.42231
FABP1	1.25102e-06	0.0284607	1.08651
F9	1.27482e-06	0.0290021	1.63475
PTGIS	1.28864e-06	0.0293166	1.19224
DEFB1	1.56761e-06	0.0356631	1.29883
ITIH1	1.63232e-06	0.0371353	1.30043
VNN1	1.73694e-06	0.0395155	1.40799
HGD	1.75344e-06	0.0398908	1.14787
AZGP1	1.83409e-06	0.0417256	1.00591
AOX1	1.85162e-06	0.0421244	1.27558
LIPC	1.89684e-06	0.0431532	1.28517
G6PC	1.90206e-06	0.0432718	1.22168
SULT2A1	1.92239e-06	0.0437344	1.22401
BHMT2	1.94819e-06	0.0443214	1.07981
AKR1C1	2.02717e-06	0.046118	1.2003
AKR1D1	2.16409e-06	0.049233	1.06481
PRELP	2.16798e-06	0.0493215	1.14656
MMP3	9.33285e-15	2.12322e-10	-2.99722
MMP1	7.55961e-13	1.71981e-08	-3.102
FCGBP	1.56579e-11	3.56218e-07	-1.92233
TMEM158	1.26972e-10	2.88862e-06	-1.7567
FBLN1	1.46854e-10	3.34093e-06	-1.72879
ACTG2	1.68984e-10	3.84439e-06	-2.24329
SPINK4	2.35232e-10	5.35153e-06	-1.79216
MUC2	4.47776e-10	1.01869e-05	-1.57852
VWF	6.42798e-10	1.46237e-05	-1.80343
DES	2.52205e-09	5.73767e-05	-1.40951
CLCA1	2.52205e-09	5.73767e-05	-1.25945
CHL1	7.97093e-09	0.000181339	-1.15892
ZG16	1.65208e-08	0.000375847	-1.7961
P2RY14	1.67471e-08	0.000380996	-1.2236
CLCA4	2.11515e-08	0.000481197	-1.81488
SPARCL1	4.87803e-08	0.00110975	-1.58402
MMP2	7.44701e-08	0.0016942	-1.18752
PLA2G2A	8.68526e-08	0.0019759	-1.17212
WNT5A	1.15586e-07	0.00262957	-1.37039
CHN1	1.40863e-07	0.00320463	-1.39412
CTSK	1.79952e-07	0.0040939	-1.16895
CAV1	2.0195e-07	0.00459436	-1.18427
MAB21L2	2.25671e-07	0.00513401	-1.36231
FOXF1	2.25671e-07	0.00513401	-1.07849
CA2	2.7986e-07	0.00636682	-1.10392
VIP	3.59848e-07	0.00818655	-1.0799
PLAC8	3.70934e-07	0.00843874	-1.16948
TFF1	6.9216e-07	0.0157466	-1.0255
CEACAM7	8.74973e-07	0.0199056	-1.04279
CXCL14	1.35438e-06	0.0308122	-1.60451
