# Supplementary material for: Identification of Hub Genes Related to Liver Metastasis of Colorectal Cancer by Integrative Analysis
Source: Front Oncol. 2021 Aug 19;11:714866. doi: 10.3389/fonc.2021.714866 (PMC8417325; doi:10.3389/fonc.2021.714866)
Supplement: Supplementary file 3 [file Table_2.xlsx]

## Sheet: Sheet1
node_name	MCC	DMNC	MNC	Degree	EPC	BottleNeck	EcCentricity	Closeness	Radiality	Betweenness	Stress	ClusteringCoefficient
AADAC	1	0	1	1	1.444	1	0.16667	45.6	4.03876	0	0	0
HGD	355000000000	0.71442	25	26	15.076	4	0.2	73.1167	5.03101	393.584	2816	0.52308
ADH1A	49	0.58344	5	6	1.831	2	0.2	52.0333	4.33333	49.1296	358	0.6
CDH2	92200000000000	0.8649	26	27	17.986	7	0.25	75.0833	5.12403	348.108	3060	0.62678
UGT2B15	48	0.28846	11	11	3.312	1	0.2	58.8667	4.5814	165.093	1584	0.30909
UGT2B4	48	0.28846	11	11	3.148	2	0.2	58.8667	4.5814	165.093	1584	0.30909
AOX1	70	0.46652	8	8	2.898	3	0.2	56.4	4.49612	123.864	1074	0.57143
CYP2E1	82	0.32197	12	12	3.263	4	0.2	63.5333	4.79845	470.974	2636	0.33333
ADH1B	48	0.58344	5	5	1.521	1	0.16667	45.1833	3.91473	0.18182	2	0.9
AFM	6270000000	0.88884	18	18	15.058	1	0.2	67.7833	4.90698	5.45052	112	0.79085
F9	92200000000000	0.97672	34	35	21.933	2	0.2	78.5333	5.14729	138.06	1678	0.65882
APOA2	92200000000000	0.93572	49	49	25.762	10	0.25	86.0833	5.29457	169.704	2230	0.59439
F2	92200000000000	0.92948	55	56	27.276	8	0.25	90.4167	5.3876	613.278	5502	0.5487
AZGP1	12500000000	0.98146	15	15	12.995	1	0.2	65.7833	4.86047	1.46684	34	0.93333
KNG1	92200000000000	0.91747	45	45	25.236	4	0.25	84.25	5.27132	415.214	4334	0.59899
SERPINA10	92200000000000	0.98235	41	41	24.732	1	0.25	82.25	5.24031	109.907	2054	0.66098
AMBP	92200000000000	0.97027	46	46	25.996	4	0.25	84.25	5.25581	129.029	2048	0.62899
TTR	92200000000000	0.93975	47	50	25.785	7	0.25	87.3333	5.33333	1095.99	9158	0.53551
APOA1	92200000000000	0.79113	63	63	27.724	9	0.25	94.0833	5.44961	586.922	6282	0.4639
AHSG	92200000000000	0.89848	58	58	28.038	4	0.25	91.0833	5.3876	386.654	4696	0.54083
HP	92200000000000	0.87041	46	46	25.016	1	0.25	84.1667	5.24806	174.91	2274	0.56425
APCS	23700000000000	0.97661	22	22	16.804	2	0.2	70.95	4.99225	15.0742	354	0.80952
C8A	92200000000000	0.85246	40	40	22.833	2	0.2	81.0333	5.18605	198.396	2612	0.57821
C3	92200000000000	0.82718	55	56	27.527	8	0.25	89.75	5.35659	919.288	7214	0.48831
GC	92200000000000	0.96249	49	49	26.434	1	0.25	86.25	5.30233	204.379	2656	0.61139
HPX	92200000000000	0.9748	39	39	23.709	1	0.25	80.5	5.18605	105.35	1614	0.66667
CP	92200000000000	1.03799	43	43	23.975	2	0.25	83.0833	5.24806	80.2305	1370	0.68771
HRG	92200000000000	0.9483	48	49	26.181	6	0.25	86.0833	5.29457	442.892	4286	0.58163
AGT	92200000000000	0.9778	32	32	21.197	1	0.2	76.8667	5.11628	100.654	1480	0.71371
CPB2	92200000000000	0.959	38	38	22.8	2	0.2	80.2	5.17829	75.6114	1554	0.66145
APOH	92200000000000	1.03506	45	45	25.822	1	0.25	83.9167	5.25581	80.0048	1446	0.67576
MMP2	11205	0.51076	15	16	8.994	2	0.2	66.7	4.88372	179.42	1286	0.425
C5	31704	0.65315	14	14	10.281	1	0.2	62.5333	4.71318	23.5821	302	0.63736
CCL2	9219898	0.62951	23	23	14.471	3	0.25	72.0833	5.04651	257.815	2102	0.51383
APOC3	92200000000000	0.84204	47	47	25.034	3	0.25	84.9167	5.27132	248.218	2826	0.54209
APOB	92200000000000	0.80487	62	62	27.646	4	0.25	93.4167	5.43411	733.923	6514	0.47435
APOE	92200000000000	0.82352	48	49	25.09	2	0.25	86.5833	5.31783	457.236	4498	0.5051
CRP	92200000000000	0.78631	40	40	21.898	1	0.25	81.9167	5.24031	287.498	3088	0.53333
VWF	92200000000000	0.85718	33	33	21.227	1	0.2	76.95	5.10078	102.54	1428	0.61932
FABP1	92200000000000	0.92124	31	32	20.652	2	0.25	77.4167	5.15504	433.967	3842	0.6371
ALB	92200000000000	0.59703	78	78	29.149	16	0.25	102.583	5.6124	2938.96	17262	0.32734
FGA	92200000000000	0.87378	60	60	28.487	1	0.25	92.0833	5.4031	345.569	4710	0.52034
P2RY14	24	0.56839	4	4	4.496	1	0.2	54.6167	4.47287	0	0	1
PLG	92200000000000	0.92258	46	46	26.057	1	0.25	84.1667	5.24806	208.143	2802	0.59807
FGG	92200000000000	0.92234	57	57	28.89	1	0.25	90.5833	5.37984	323.673	4320	0.55827
ITIH2	92200000000000	1.03585	46	46	25.994	1	0.25	84.9167	5.28682	99.7874	2028	0.6715
F5	92200000000000	1.09907	31	31	21.988	1	0.25	76.4167	5.12403	27.3011	570	0.81075
SERPINC1	92200000000000	0.91758	58	58	27.912	1	0.25	90.9167	5.37984	258.673	4266	0.55233
RBP4	92200000000000	1.06344	30	30	20.738	1	0.25	76.25	5.13178	34.359	600	0.7931
TF	92200000000000	1.02947	41	41	24.82	1	0.25	82.25	5.24031	141.279	1606	0.69268
SERPIND1	92200000000000	1.0875	36	36	24.029	1	0.25	79.0833	5.17054	30.8569	688	0.76349
ORM1	92200000000000	0.9613	47	47	26.047	1	0.25	84.6667	5.25581	125.957	1978	0.61887
C6	8640000000000	0.92177	27	27	19.198	1	0.2	71.5333	4.93023	40.1314	662	0.71225
ITIH4	92200000000000	1.01877	29	29	20.625	1	0.25	75.1667	5.09302	22.8162	438	0.76847
ASGR1	367974	0.71711	12	12	9.893	1	0.2	64.95	4.86822	11.1895	156	0.74242
ITIH1	840	0.69516	7	7	8.187	1	0.2	57.45	4.56589	0.14667	4	0.90476
LECT2	4	0.30779	2	4	2.979	1	0.2	55.45	4.51938	11.0066	136	0.16667
IGFBP1	92200000000000	0.96296	35	37	22.901	8	0.33333	81	5.24806	1204.11	9604	0.61111
HPD	151	0.54881	7	8	6.262	1	0.2	62.45	4.81395	163.136	1156	0.53571
TM4SF4	5670000000000	0.96848	23	24	16.976	2	0.2	70.45	4.93798	302.853	3260	0.72464
FGB	92200000000000	0.95592	53	54	27.165	2	0.25	88.75	5.34109	383.179	3966	0.57023
SERPINA7	92200000000000	1.11584	30	30	21.811	1	0.25	75.5833	5.10078	14.3047	380	0.83218
SERPINA5	86500000000000	1.06264	21	21	17.177	1	0.2	70.6167	4.99225	4.25423	92	0.89524
SERPINA6	1570000000000	0.99168	18	18	15.21	1	0.2	68.45	4.93798	11.6895	212	0.88235
ASGR2	41070	0.73825	10	10	9.493	1	0.2	60.7	4.68217	1.38048	22	0.82222
ANGPTL3	188000000000	0.89828	22	22	16.236	1	0.2	68.7	4.87597	19.462	320	0.74459
C8B	5190000000000	0.8849	29	29	18.851	1	0.2	71.8667	4.91473	41.4161	696	0.66749
GIG25	114000000000	1.0431	18	19	15.254	2	0.33333	70.6667	5.04651	460.365	3542	0.83041
FGL1	92200000000000	1.05495	22	22	17.727	1	0.25	70.5833	4.99225	13.5894	346	0.87446
ITIH3	92200000000000	0.97343	40	40	23.549	1	0.25	81.25	5.2093	117.655	2060	0.66026
SPARCL1	92200000000000	1.09151	22	22	18.022	1	0.25	71.4167	5.03101	9.49849	142	0.90476
SERPINA1	92200000000000	0.98368	46	46	26.597	1	0.25	84.5833	5.27132	156.97	2132	0.63768
AKR1C1	8	0.37893	4	4	1.634	1	0.16667	45.35	3.95349	1.33586	10	0.66667
AKR1D1	20	0.38039	6	8	2.92	3	0.2	58.1167	4.5969	160.909	1106	0.28571
AKR1C4	14	0.38896	5	5	1.687	1	0.16667	46.1833	3.99225	3.81388	26	0.6
CYP27A1	32	0.51861	5	7	5.512	2	0.2	61.7833	4.79845	158.05	1172	0.42857
HSD11B1	20	0.42794	6	6	1.825	1	0.2	48.2	4.10853	7.00667	56	0.6
CA2	725	0.49567	8	9	7.817	2	0.2	63.95	4.86822	74.358	602	0.47222
SULT2A1	278	0.55399	8	12	8.102	2	0.25	65.75	4.92248	355.113	2968	0.34848
G6PC	962	0.57279	9	9	7.282	1	0.25	62.5833	4.82171	15.1006	124	0.66667
CHL1	2	0.30779	2	2	2.852	1	0.2	56.8667	4.64341	0	0	1
PON3	24	0.56839	4	4	5.651	1	0.2	58.7	4.69767	0	0	1
RGN	3	0.30779	2	3	2.609	1	0.2	57.5333	4.65891	8.66247	74	0.33333
MTTP	4320	0.67872	11	11	9.343	1	0.2	63.5333	4.82171	6.91312	100	0.72727
PLA2G2A	14	0.33284	6	6	4.204	1	0.2	61.95	4.82171	73.0884	760	0.46667
VIP	2	0.30779	2	2	3.295	1	0.2	57.2	4.65891	0	0	1
APOC1	4354560	0.89273	12	12	11.488	1	0.2	64.7833	4.86047	3.33497	66	0.92424
CFH	1510094	0.62026	20	20	13.809	1	0.2	69.45	4.95349	103.598	1220	0.53158
ARG1	176	0.41901	10	10	6.646	1	0.2	64.45	4.87597	47.2169	334	0.46667
MMP1	750	0.58315	8	8	5.602	1	0.2	61.2	4.75194	13.3595	164	0.71429
HAMP	722	0.5854	7	7	6.965	1	0.2	60.0333	4.71318	6.724	32	0.7619
HAO1	524286	0.72071	14	14	10.844	1	0.2	65.95	4.88372	27.0187	368	0.7033
TDO2	32	0.36588	7	7	4.761	1	0.2	61.45	4.78295	9.68786	76	0.47619
SLC2A2	95800000000	0.81837	23	23	15.43	1	0.2	71.2	4.99225	63.377	766	0.66798
DEFB1	2	0.30779	2	2	2.734	1	0.2	56.5333	4.62791	0	0	1
HPR	88300000	0.8662	17	17	14.016	1	0.2	66.6167	4.86822	6.38835	102	0.78676
CAV1	985	0.69977	8	9	7.858	2	0.2	62.5333	4.79845	256.944	1978	0.66667
MMP3	6162	0.54924	13	13	8.55	1	0.25	65.1667	4.87597	55.6216	508	0.55128
CPS1	10	0.37893	4	6	3.785	3	0.2	61.1167	4.78295	234.116	1266	0.26667
ALDH8A1	479000000	0.77114	15	15	11.009	1	0.2	64.0333	4.75969	14.1966	166	0.73333
PIPOX	30	0.51861	5	5	3.847	1	0.2	55.8667	4.52713	0.46635	6	0.8
ALDOB	1584	0.64439	9	9	8.042	1	0.2	60.6167	4.70543	3.51771	50	0.75
C9	13600000000	0.78903	27	27	17.859	1	0.2	71.7833	4.94574	44.4184	792	0.60969
LIPC	404760	0.72807	13	13	10.679	1	0.2	63.3667	4.76744	6.32706	80	0.73077
FMO3	6	0.46346	3	3	1.234	1	0.16667	43.6	3.86822	0	0	1
CYP2C8	28	0.34989	8	8	2.104	1	0.2	49.45	4.13953	34.3555	166	0.42857
C4BPA	11520	0.71266	11	11	10.067	1	0.2	60.3667	4.63566	2.10823	36	0.76364
WNT5A	21	0.42794	6	7	4.574	1	0.2	59.1167	4.65891	116.607	724	0.42857
CYP4F2	8	0.46346	3	5	3.191	1	0.2	57.45	4.62016	33.8272	398	0.3
PLAC8	8	0.37893	4	4	3.929	1	0.2	57.3667	4.63566	2.2923	30	0.66667
COLEC11	1	0	1	1	1.924	1	0.2	51.45	4.36434	0	0	0
FHR2	2	0.30779	2	2	2.63	1	0.2	52.1167	4.37984	0	0	1
CFHR4	12	0.47366	4	4	4.36	1	0.2	56.7	4.5814	0.125	2	0.83333
C7	844	0.6123	8	8	7.489	1	0.2	57.2833	4.53488	1.43754	38	0.75
CTSK	9	0.46346	3	6	3.092	1	0.2	54.1167	4.42636	19.3865	92	0.26667
PTGIS	1	0	1	1	1.267	1	0.16667	41.7167	3.8062	0	0	0
CXCL14	2	0.30779	2	2	2.068	1	0.2	46.7833	4.11628	0	0	1
CEACAM7	3	0.30779	2	3	1.245	2	0.2	38.7167	3.45736	256	1680	0.33333
CLCA4	10	0.32413	5	5	2.116	5	0.25	51.75	4.34109	421.598	3164	0.5
FCGBP	9	0.37893	4	5	1.948	1	0.25	48.4167	4.16279	249.757	1984	0.4
VNN1	1	0	1	1	1.044	1	0.16667	29.6333	2.46512	0	0	0
CLCA1	10	0.32413	5	5	2.303	2	0.25	51.75	4.34109	238.106	2242	0.5
SPINK4	3	0.30779	2	3	1.296	1	0.2	38.8833	3.47287	11.7958	48	0.33333
ZG16	8	0.37893	4	4	1.256	1	0.2	39.4667	3.48062	8.5698	40	0.66667
FOXF1	2	0	1	2	1.353	1	0.16667	43.4333	3.89922	4	4	0
DPYS	2	0	1	2	1.406	1	0.16667	43.0167	3.87597	1	4	0
TFF1	2	0	1	2	2.071	1	0.2	48.45	4.2093	109.466	1018	0
FBLN1	2	0	1	2	2.167	1	0.2	53.6167	4.46512	0.49885	14	0
PRELP	1	0	1	1	1.878	1	0.2	50.2	4.30233	0	0	0
TMEM158	1	0	1	1	1.46	1	0.16667	44.4333	3.94574	0	0	0
